# Supplementary material for: Association of Blood Donor Sex and Age With Outcomes in Very Low-Birth-Weight Infants Receiving Blood Transfusion
Source: PubMed Central journal article supplement (PMC8417762; doi:10.1001/jamanetworkopen.2021.23942), 2021-09-03
Supplement: jamanetwopen-e2123942-s001.pdf [file jamanetwopen-e2123942-s001.pdf]

## Supplemental Online Content

Patel RM, Lukemire J, Shenvi N, et al. Association of blood donor sex and age with outcomes in very low-birth-weight infants receiving blood transfusion. *JAMA Netw Open*. 2021;4(9):e2123942. doi:10.1001/jamanetworkopen.2021.23942

**eFigure 1.** Conceptual Model

**eFigure 2.** Distribution of Donor Age Stratified by Sex

**eFigure 3.** Number of Transfusions by Number of Donors

**eFigure 4.** Relative Risk of the Primary Outcome by Donor Age and Number of Transfusions

**eTable 1.** Incidence of Outcomes by Donor Sex

**eTable 2.** Parameter Estimates From Primary and Expanded Models

This supplemental material has been provided by the authors to give readers additional information about their work.

eFigure 1. Conceptual Model

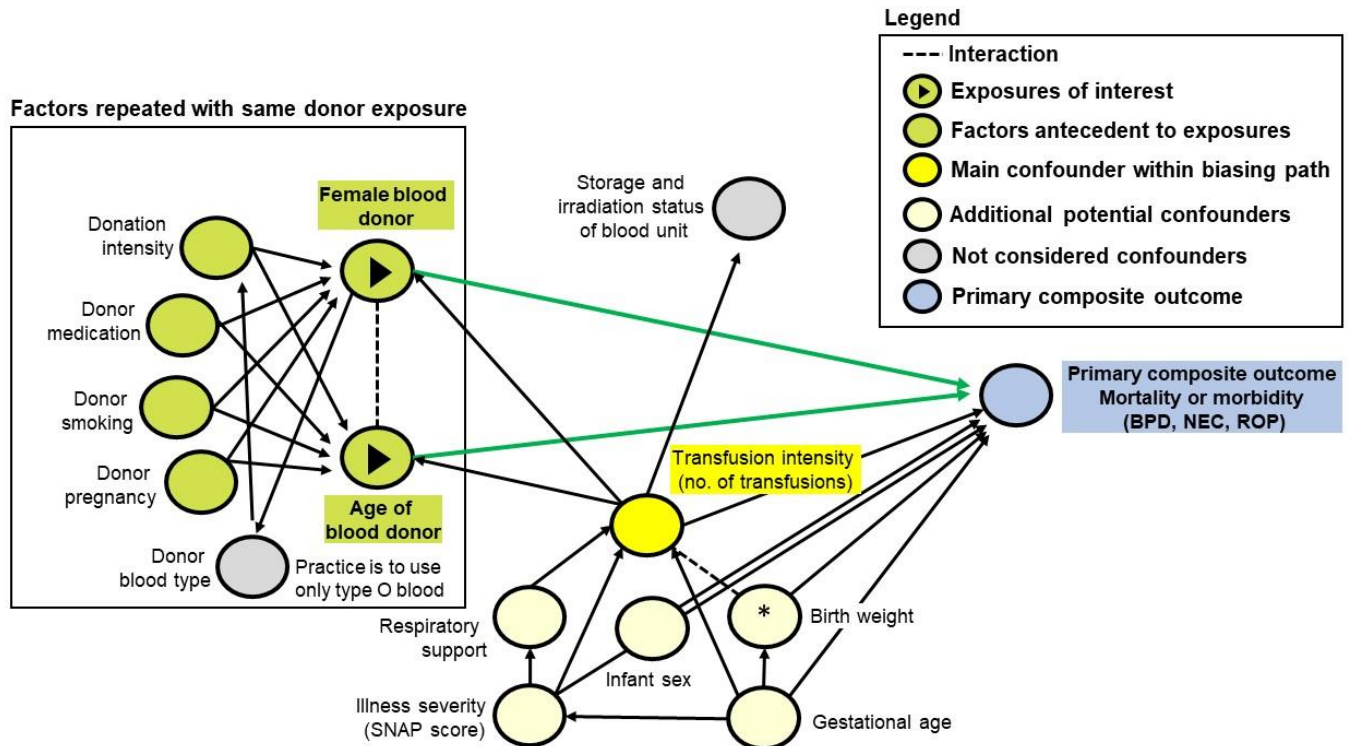

**Legend:** Figure depicts a conceptual model of associations between exposures of interest (green circles with black triangles), factors antecedent to exposures of interest (green circles), primary outcome (blue circle), main confounder (yellow circle), additional potential confounders within biasing path of number of transfusions (light yellow) and covariates that were not considered confounders (gray circles). Green arrows indicate the associations of interest between the study exposures and outcome. Dotted lines indicate potential interaction. Because red blood cell transfusions are not allocated based on donor age or sex, the main biasing path between the exposure and outcome is transfusion intensity, as a greater number of transfusions (or potentially a greater rate or volume of transfusions) may influence utilization of blood bank inventory of red blood cells from more common vs. less common donor types (blood units from female donors are less common than male donors). Because storage and irradiation of red blood cells are not based on donor characteristics, this was not considered a potential confounder for the primary analysis. As routine practice is to use type O blood for neonatal red blood cell transfusion, donor blood type was not considered a potential confounder. Figure edited after being initially generated using DAGitty (Johannes Textor, Benito van der Zander, Mark K. Gilthorpe, Maciej Liskiewicz, George T.H. Ellison. Robust causal inference using directed acyclic graphs: the R package 'dagitty'. International Journal of Epidemiology 45(6):1887-1894, 2016). Abbreviations: BPD, bronchopulmonary dysplasia; NEC, necrotizing enterocolitis; ROP, retinopathy of prematurity; SNAP, Score for Neonatal Acute Physiology.

**eFigure 2. Distribution of Donor Age Stratified by Sex**

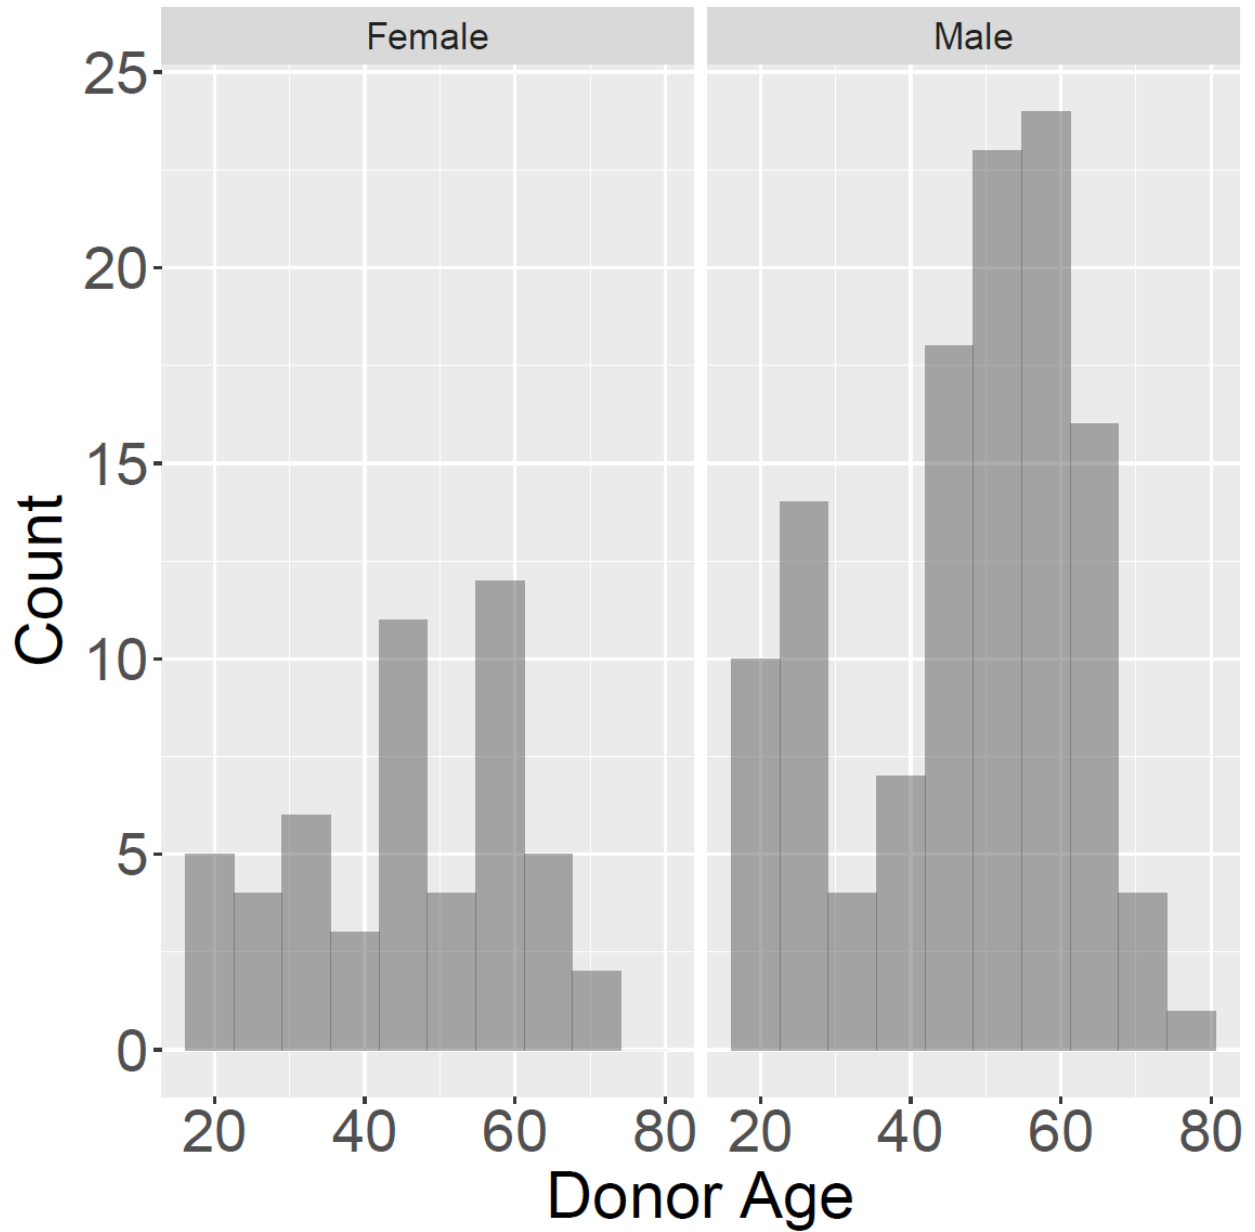

**Legend:** This figure shows the distribution of donor age among male and female donors. The mean age of female donors was 45.0 years (standard deviation 13.9). The mean age of male donors was 47.3 years (standard deviation 13.6).

**eFigure 3. Number of Transfusions by Number of Donors**

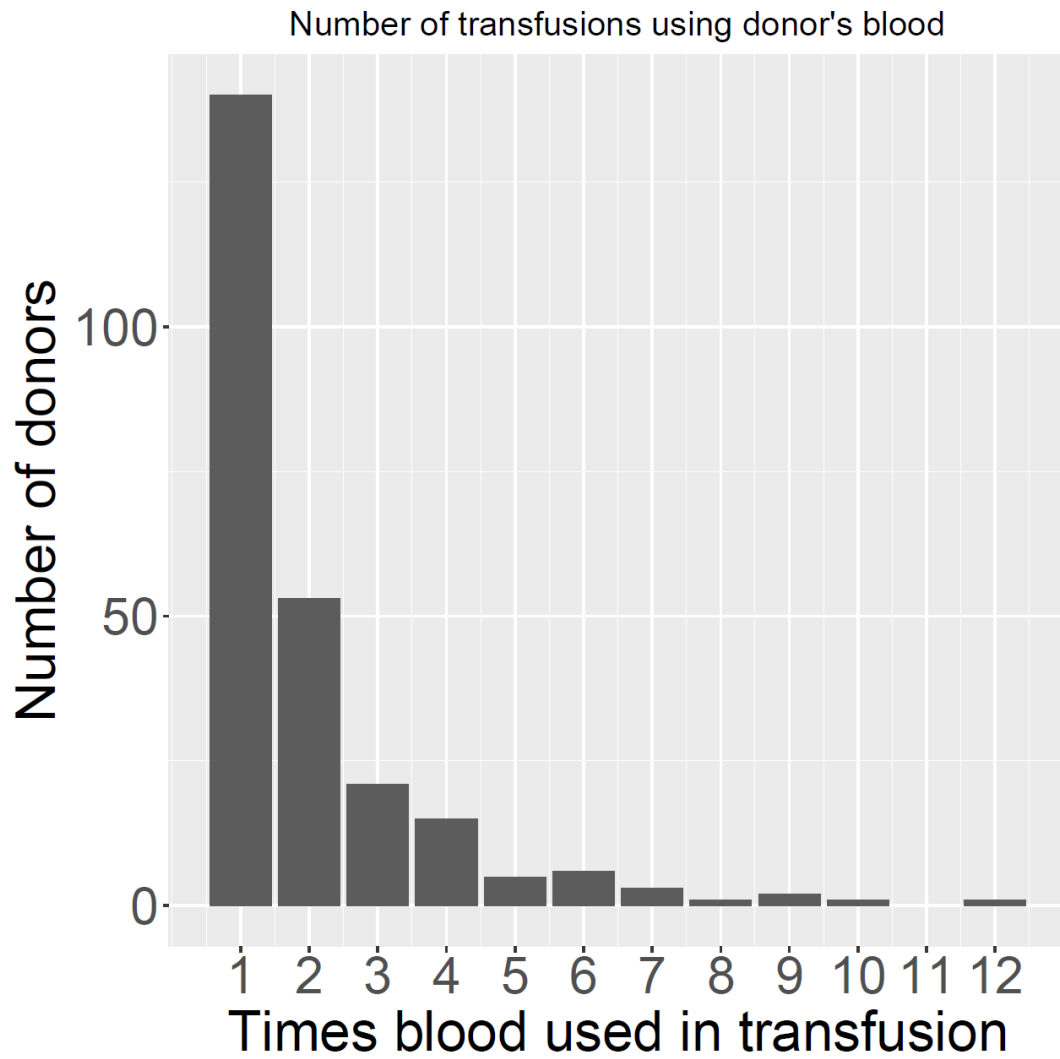

**Legend:** This figure shows multiple donor exposures on the x-axis (number of times a donor's blood was used for red cell transfusion), by the number of donors on the y-axis. Most infants received 1-3 red cell transfusions from a single donor.

**eFigure 4. Relative Risk of the Primary Outcome by Donor Age and Number of Transfusions**

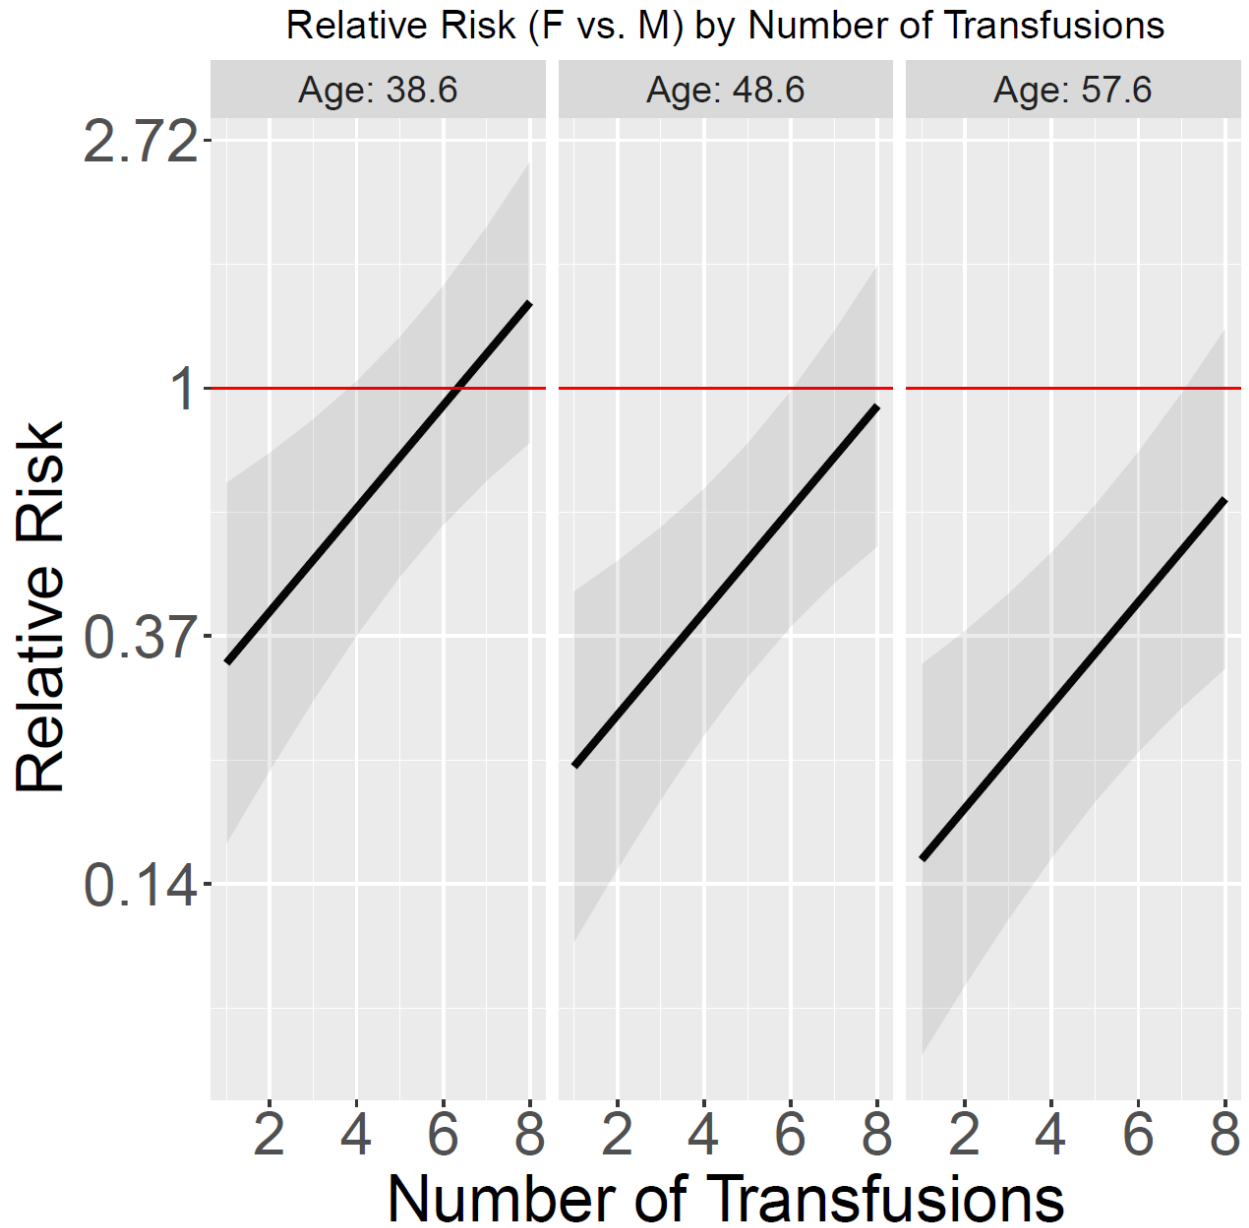

**Legend:** This figure reports relative risk estimates (black lines), with corresponding 95% confident intervals (gray shaded areas) to account for the interaction between donor age and donor sex as well as the number of transfusions and donor sex. The relative risks of the primary outcome are shown, comparing infants who received red cell transfusion from exclusively female donors (F) to exclusively male donors (M), by the number of transfusions (x-axis) and the ages of donors at the 25<sup>th</sup>, 50<sup>th</sup> and 75<sup>th</sup> percentile of mean donor ages (top headings and vertical panels). Values less than 1 (red line) indicate a protective association between transfusion of RBCs from female donors and the risk of the primary composite adverse outcome.

**eTable 1. Incidence of Outcomes by Donor Sex**

| Outcome                                                                          | Infants with only female donor RBC transfusion | Infants with only male donor RBC transfusion | Infants with both female and male donor RBC transfusion <sup>a</sup> |
|----------------------------------------------------------------------------------|------------------------------------------------|----------------------------------------------|----------------------------------------------------------------------|
| Composite                                                                        | 12/56 (21.4%)                                  | 56/125 (44.8%)                               | 102/143 (71.3%)                                                      |
| Death                                                                            | 2/56 (3.6%)                                    | 15/125 (12.0%)                               | 14/143 (9.8%)                                                        |
| BPD                                                                              | 9/56 (16.1%)                                   | 35/125 (28.0%)                               | 82/143 (57.3%)                                                       |
| NEC                                                                              | 1/56 (1.8%)                                    | 12/125 (9.6%)                                | 30/143 (21.0%)                                                       |
| ROP                                                                              | 1/56 (1.8%)                                    | 3/125 (2.4%)                                 | 16/143 (11.2%)                                                       |
| Number of transfusions, median (25 <sup>th</sup> , 75 <sup>th</sup> percentiles) | 2 (1, 3)                                       | 2 (1, 3)                                     | 7 (4, 11)                                                            |

Data are reported as n/N (%), unless otherwise noted.

Abbreviations: RBC, red blood cell; BPD, bronchopulmonary dysplasia; NEC, necrotizing enterocolitis; ROP, retinopathy of prematurity.

<sup>a</sup> These infants were excluded from the primary analyses, because a single consistent donor sex could not be assigned.

**eTable 2. Parameter Estimates From Primary and Expanded Models**

| Variable                                              | Model 1:<br>Primary<br>model  | Model 2:<br>Addition of<br>gestational<br>age | Model 3:<br>Addition<br>of storage<br>age of<br>RBCs | Model 4:<br>Addition<br>of storage<br>age of<br>RBCs<br>post-<br>irradiation | Model 5:<br>Addition<br>of<br>multiple<br>donor<br>exposure<br>and<br>illness<br>severity | Model 6:<br>Addition<br>of center |
|-------------------------------------------------------|-------------------------------|-----------------------------------------------|------------------------------------------------------|------------------------------------------------------------------------------|-------------------------------------------------------------------------------------------|-----------------------------------|
| Female donor sex                                      | -1.651 ±<br>0.406,<br><0.0001 | -1.668 ±<br>0.403,<br><0.0001                 | -1.649 ±<br>0.406,<br><0.0001                        | -1.618 ±<br>0.406,<br><0.0001                                                | -1.780 ±<br>0.436,<br><0.0001                                                             | -1.717<br>± 0.401,<br><0.0001     |
| Mean donor age<br>(Centered)                          | 0.007 ±<br>0.007,<br>0.29     | 0.007 ±<br>0.007,<br>0.31                     | 0.007 ±<br>0.007,<br>0.32                            | 0.007 ±<br>0.007,<br>0.25                                                    | 0.007 ±<br>0.007,<br>0.34                                                                 | 0.005 ±<br>0.007,<br>0.49         |
| Total number of<br>transfusions                       | -0.151 ±<br>0.074,<br>0.04    | -0.165 ±<br>0.081,<br>0.04                    | -0.152 ±<br>0.074,<br>0.04                           | -0.150 ±<br>0.074,<br>0.04                                                   | 0.036 ±<br>0.019,<br>0.06                                                                 | -0.144 ±<br>0.075,<br>0.05        |
| Birth weight (per 1 gram)                             | -0.002 ±<br>0.001,<br>0.002   | -0.002 ±<br>0.001,<br>0.003                   | -0.002 ±<br>0.001,<br>0.003                          | -0.002 ±<br>0.001,<br>0.0008                                                 | -0.001 ±<br>0.001,<br>0.009                                                               | -0.002 ±<br>0.001,<br>0.004       |
| Total number of<br>transfusions x Female<br>donor sex | 0.208 ±<br>0.062,<br>0.0008   | 0.212 ±<br>0.060,<br>0.0004                   | 0.207 ±<br>0.062,<br>0.0007                          | 0.201 ±<br>0.063,<br>0.002                                                   | 0.177 ±<br>0.068,<br>0.009                                                                | 0.225 ±<br>0.059,<br>0.0001       |
| Total number of<br>transfusions x Birth weight        | 0.0003 ±<br>0.0001,<br>0.006  | 0.0003 ±<br>0.0001,<br>0.007                  | 0.0003 ±<br>0.0001,<br>0.006                         | 0.0003 ±<br>0.0001,<br>0.007                                                 | a                                                                                         | 0.0003 ±<br>0.0001,<br>0.007      |
| Mean donor age<br>(Centered) x Female donor<br>sex    | -0.042 ±<br>0.015,<br>0.005   | -0.042 ±<br>0.015,<br>0.005                   | -0.041 ±<br>0.015,<br>0.006                          | -0.039 ±<br>0.016,<br>0.01                                                   | -0.045 ±<br>0.018,<br>0.01                                                                | -0.045 ±<br>0.015,<br>0.004       |
| Gestational age (per 1<br>week)                       |                               | 0.036 ±<br>0.049, 0.46                        |                                                      |                                                                              |                                                                                           |                                   |
| Mean RBC storage age<br>(per 1 day)                   |                               |                                               | -0.003 ±<br>0.023, 0.88                              |                                                                              |                                                                                           |                                   |
| Mean RBC storage post-<br>irradiation (per 1 day)     |                               |                                               |                                                      | 0.030 ±<br>0.033, 0.37                                                       |                                                                                           |                                   |
| Multiple donor exposure<br>(yes vs. no)               |                               |                                               |                                                      |                                                                              | 0.219 ±<br>0.204, 0.28                                                                    |                                   |
| SNAP score (per 1 unit)                               |                               |                                               |                                                      |                                                                              | 0.003 ±<br>0.021, 0.88                                                                    |                                   |
| Center A                                              |                               |                                               |                                                      |                                                                              |                                                                                           | -0.651 ±<br>0.312, 0.04           |
| Center B                                              |                               |                                               |                                                      |                                                                              |                                                                                           | -0.389 ±<br>0.221, 0.08           |

Estimates shown are model coefficients ( $\beta$ ) ± SE, *P*, from multivariable models that include all variables with parameter estimates provided in the corresponding column, fitted to the composite primary outcome. Empty cells indicate that variable was not included in the multivariable model. Sample sizes are the same for each model (*n*=181) because there was no missing data for any variable.

Abbreviations: RBC, red blood cell; SNAP, Score for Neonatal Acute Physiology.

<sup>a</sup> Not included to avoid overfitting model.
